# Supplementary material for: A highly efficient supramolecular adsorbent for precious metal: adsorption behavior of PdII by melamine cyanurate
Source: Royal Society of Chemistry journal article supplement (doi:10.1039/c6ra22425c), 2016-01-01
Supplement: c6ra22425c1.pdf [file c6ra22425c1.pdf]

## Supplementary Information

# A Highly Efficient Supramolecular Adsorbent for Precious Metal: Adsorption Behavior of PdII by Melamine Cyanurate

D. Nagai,\* and T. Kimoto

The XRD pattern of the separated Pd was consistent with that in the literature,<sup>1</sup> although the crystallinity decreased (Figure S1).

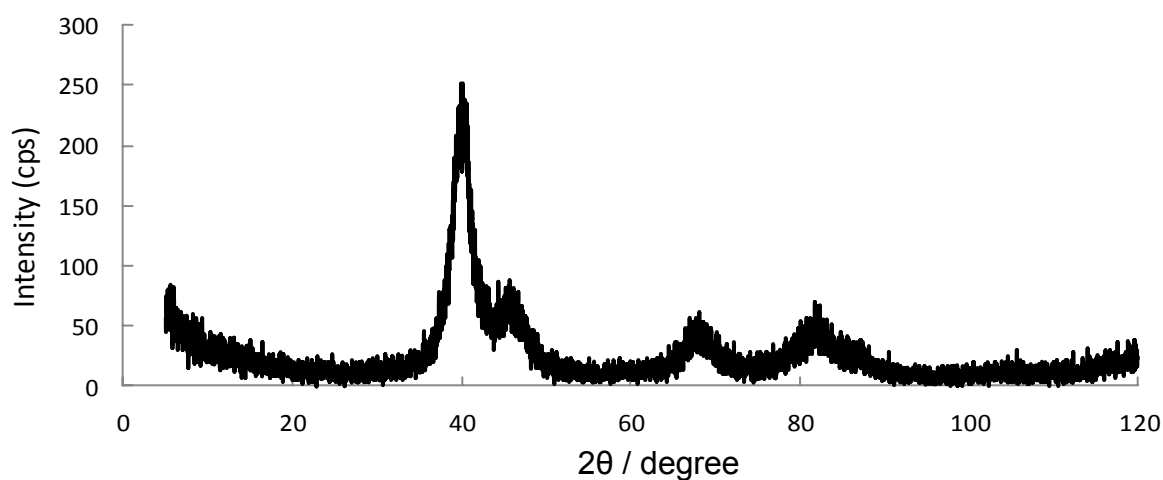

**Figure S1.** XRD spectrum of the separated Pd.

## Reference

1. C. C. Tseng, Y. H. Lin, Y. Y. Shu, C. J. Chen, and M. D. Ger *J. Taiwan Inst. Chem. E.* 2011, **42**, 989-995.

After adsorption of Pd<sup>II</sup> by M-CA, the filtrate was concentrated by reduced pressure. The residue (10 mg) and 1,4-dioxane (2 μL) were dissolved in DMSO-*d*<sub>6</sub>, and its <sup>1</sup>H NMR measurement was carried out. Based on the integral ratio of CA and 1,4-dioxane, the amount of CA in the residue was estimated. From the amount of CA and adsorption amount, the amount of M in the residue was estimated.

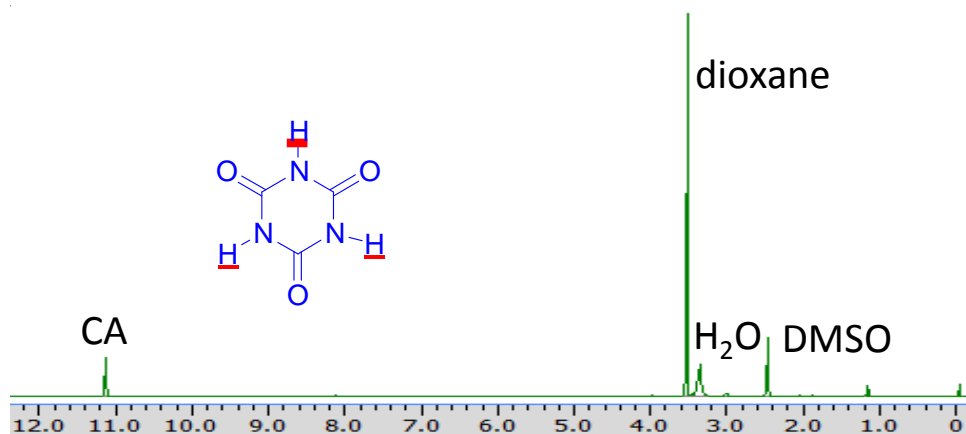

**Figure S2.** <sup>1</sup>H NMR spectrum (DMSO-*d*<sub>6</sub>, rt) of the eluted residue in the filtrate obtained from Table 5, entry 4.

**Table S1.** Comparison of calculated potential energies and bond energies for M-CA, PdCl<sub>2</sub>-M complex, and PdCl<sub>2</sub>-CA complex.

|                       | Basis set | potential energy<br>(Hartree) | bond energy |            |
|-----------------------|-----------|-------------------------------|-------------|------------|
|                       |           |                               | (Hartree)   | (kcal/mol) |
| M                     | 6-31G     | -446.51115                    | –           | –          |
| CA                    | 6-31G     | -506.13728                    | –           | –          |
| M-CA                  | 6-31G     | -952.68208                    | -0.03365    | -21.1      |
| PdCl <sub>2</sub>     | 6-31G SDD | -1048.29707                   | –           | –          |
| PdCl <sub>2</sub> -M  | 6-31G SDD | -1494.90257                   | -0.09435    | -59.2      |
| PdCl <sub>2</sub> -CA | 6-31G SDD | -1554.49037                   | -0.05602    | -35.2      |
